# Supplementary material for: New Conservative Approach for the Management of Recurrent Sublingual Ranula—A Case Report
Source: MDPI journal article supplement (doi:10.3390/ijerph20032398), 2023-01-29
Supplement: s1 [file s1]

FONDAZIONE POLICLINICO GEMELLI  
PROTOCOLLO UNICO

Tipo Atti: In Uscita  
Prot N. 0037733/22 - Del 02/12/2022  
SEGRETERIA COMITATO ETICO

Gent.ma Prof.ssa Patrizia GALLENZI  
UOC Odontoiatria generale e ortodonzia

## SEDE

**Oggetto: Case report "New conservative approach for the management of recurrent sublingual ranula.  
A case report and brief Review"**

Chiarissimo Professore,

si comunica che il Comitato Etico, nella seduta del 10 novembre 2022, ha preso atto dei documenti depositati con email dello 01/11/2022 relativi al case report "New conservative approach for the management of recurrent sublingual ranula. A case report and brief Review.

Il Presidente del Comitato Etico  
Prof. Andrea Bacigalupo

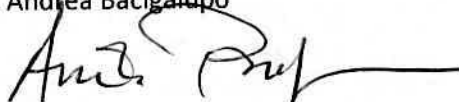

ELENCO MEMBRI PRESENTI – SEDUTA DEL 10 NOVEMBRE 2022

Prof. ANDREA BACIGALUPO – Clinico Ematologo  
Prof. DON PAOLO BONINI – Esperto di Bioetica  
Prof. ALESSANDRO CARUSO – Clinico  
Dr. ANTONELLO COCCHIERI – Rappresentante dell'area delle professioni sanitarie  
Prof. SEBASTIANO FILETTI – Clinico  
Dr. FRANCESCO FILIDORO – Farmacista esperto di dispositivi medici  
Avv. DANILO GALLITELLI – Esperto in materia giuridica e assicurativa  
Prof.ssa FIORELLA GURRIERI – Esperto di genetica  
Dr. MICHELE LEPORE – Medico di Medicina Generale  
Dr.ssa GIUSEPPINA LOFFREDI – Rappresentante del volontariato per l'assistenza e/o associazionismo di tutela dei pazienti  
Prof. CAMILLO MARRA – Clinico  
Dr.ssa BARBARA MEINI - Farmacista  
Prof.ssa NADIA MORES – Sostituto permanente del Direttore Sanitario  
Prof. GIACOMO POZZOLI – Farmacologo  
Prof.ssa KETTY PERIS – Clinico  
Prof. DARIO SACCHINI – Esperto di Bioetica  
Dr. DOMENICO TARANTINO – Farmacista
